# Supplementary material for: All-round performance improvement of semitransparent perovskite solar cells by a pressure-assisted method
Source: Royal Society of Chemistry journal article supplement (doi:10.1039/d1tc04067g), 2021-01-01
Supplement: d1tc04067g1.pdf [file d1tc04067g1.pdf]

*Supporting Information*

**All-round performance improvement of semitransparent  
perovskite solar cells by a pressure-assisted method**

Yuan Yu<sup>a</sup>, Meijia Shang<sup>b</sup>, Tao Wang<sup>b</sup>, Qian Zhou<sup>a</sup>, Yuying Hao<sup>c</sup>, Zhiyong Pang<sup>a</sup>, Deliang Cui<sup>b</sup>,

Gang Lian<sup>b\*</sup>, Xijian Zhang<sup>a\*</sup> and Shenghao Han<sup>a\*</sup>

<sup>a</sup> *School of Microelectronics, Shandong University, Jinan 250100, P. R. China.*

<sup>b</sup> *State Key Laboratory of Crystal Materials, Shandong University, Jinan 250100, P. R. China.*

<sup>c</sup> *School of Physics and Optoelectronics, Taiyuan University of Technology, Taiyuan 030024, P. R. China.*

\* To whom correspondence should be addressed.

E-mail: [liangang@sdu.edu.cn](mailto:liangang@sdu.edu.cn) (Gang Lian), [zhangxijian@sdu.edu.cn](mailto:zhangxijian@sdu.edu.cn) (Xijian Zhang),

[hansh@sdu.edu.cn](mailto:hansh@sdu.edu.cn) (Shenghao Han)

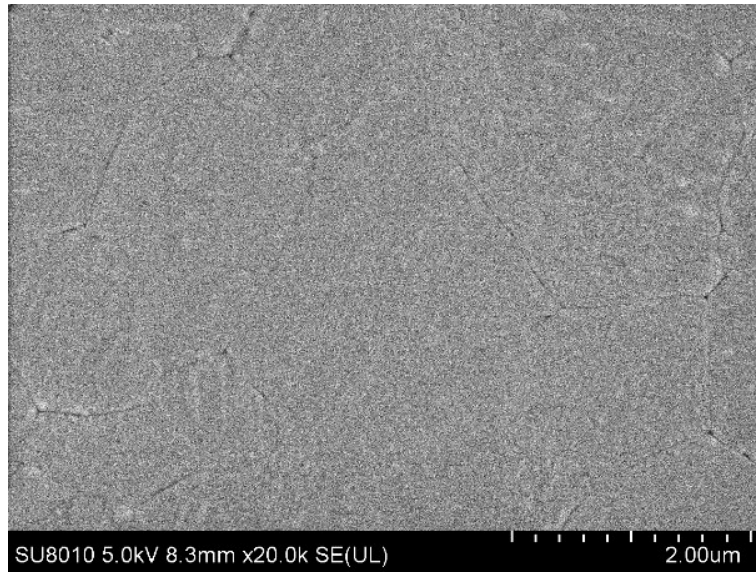

**Fig. S1** The original SEM image of Fig. 2b.

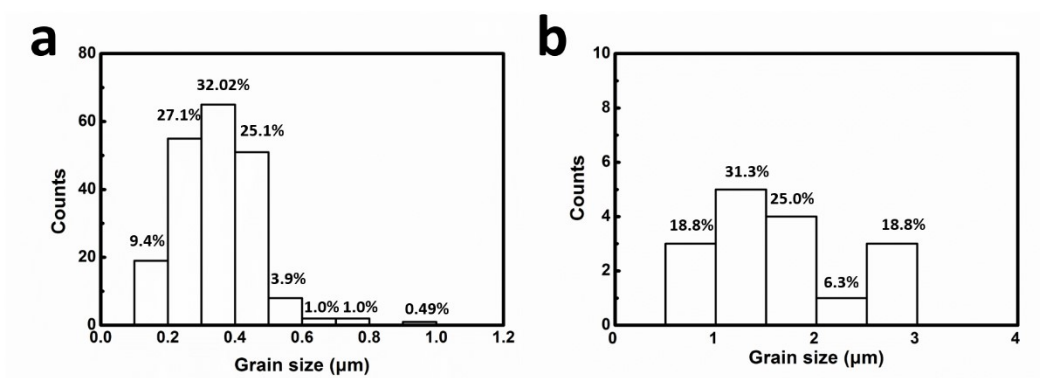

**Fig. S2** Grain distribution statistics of (a) Fig. 2a and (b) Fig. 2b.

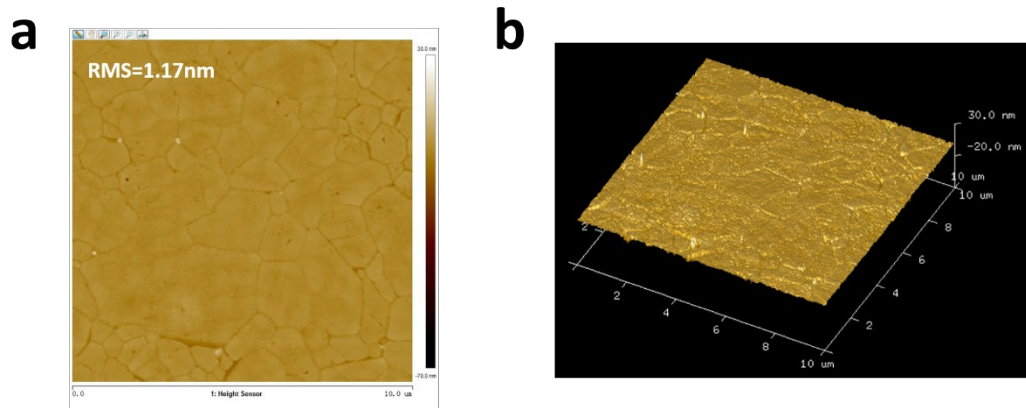

**Fig. S3** (a) AFM topographic image and (b) three-dimensional topographic image of the TPR film.

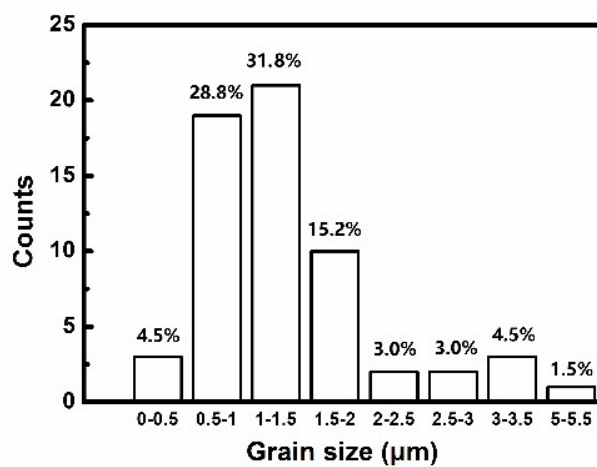

**Fig. S4** Grain distribution statistics of Figure S3.

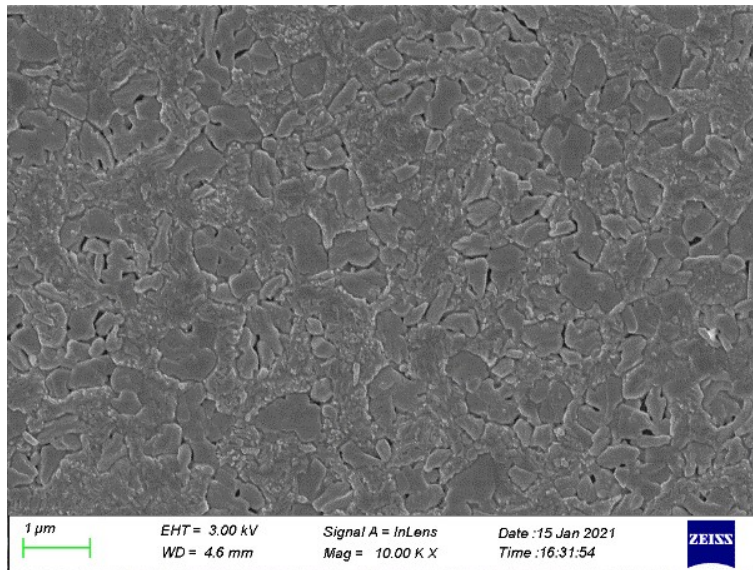

Fig. S5 Top view SEM image of the MAPbI<sub>3</sub> film annealed at 100 °C for 6 h at atmospheric pressure.

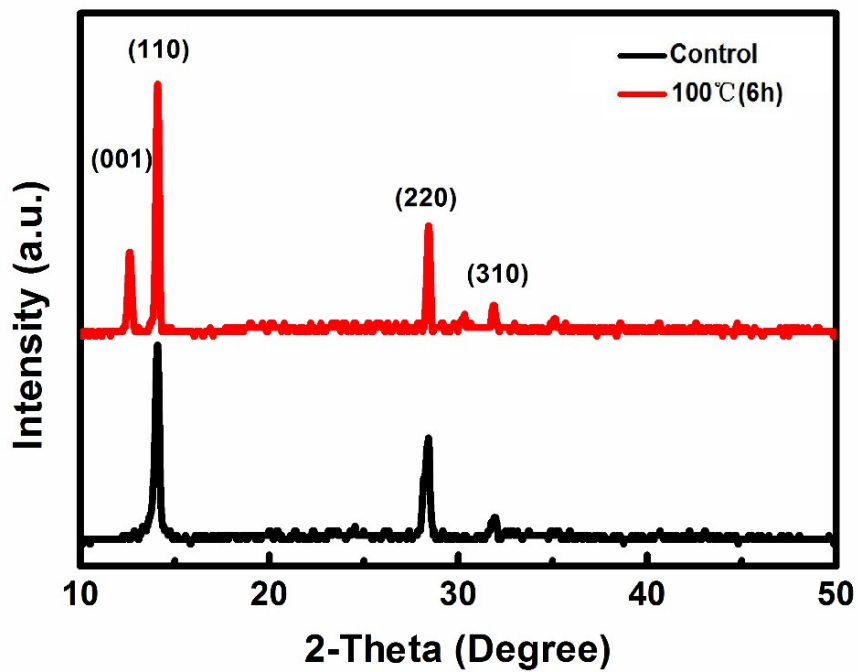

Fig. S6 XRD patterns of the precursor film and the MAPbI<sub>3</sub> film annealed at 100 °C for 6 h at atmospheric pressure.

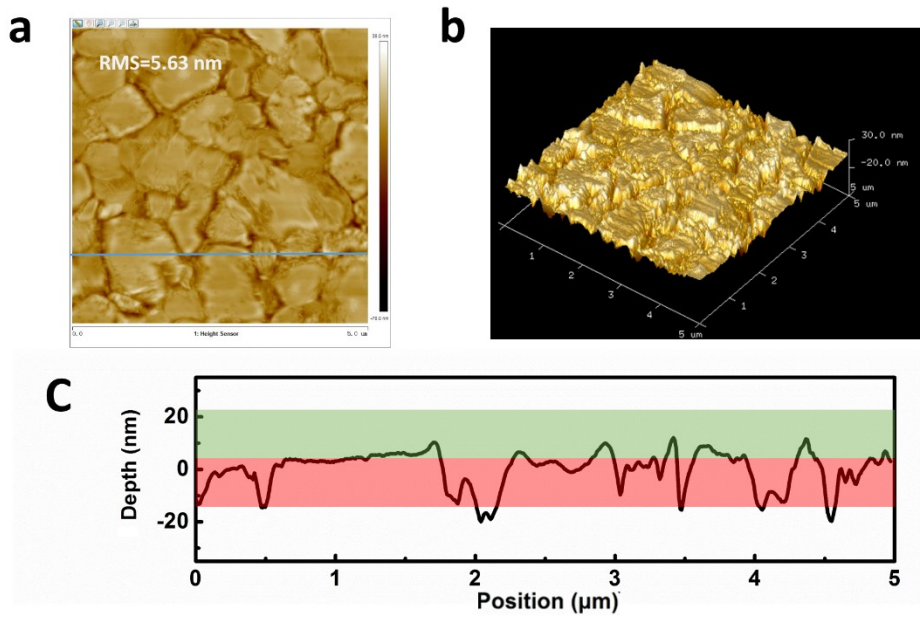

**Fig. S7** (a) AFM topographic image, (b) three-dimensional topographic image and (c) surface profile of the MAPbI<sub>3</sub> film when 150 MPa used at room temperature for 6 h.

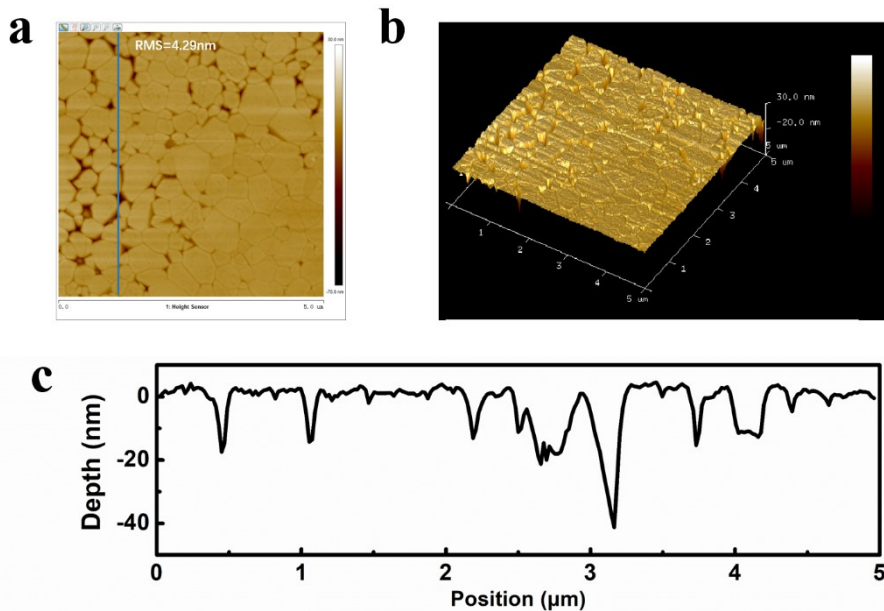

**Fig. S8** (a) AFM topographic image, (b) three-dimensional topographic AFM image and (c) surface profile of MAPbI<sub>3</sub> film annealed at 100 °C with the pressure of 100 MPa for 6 h.

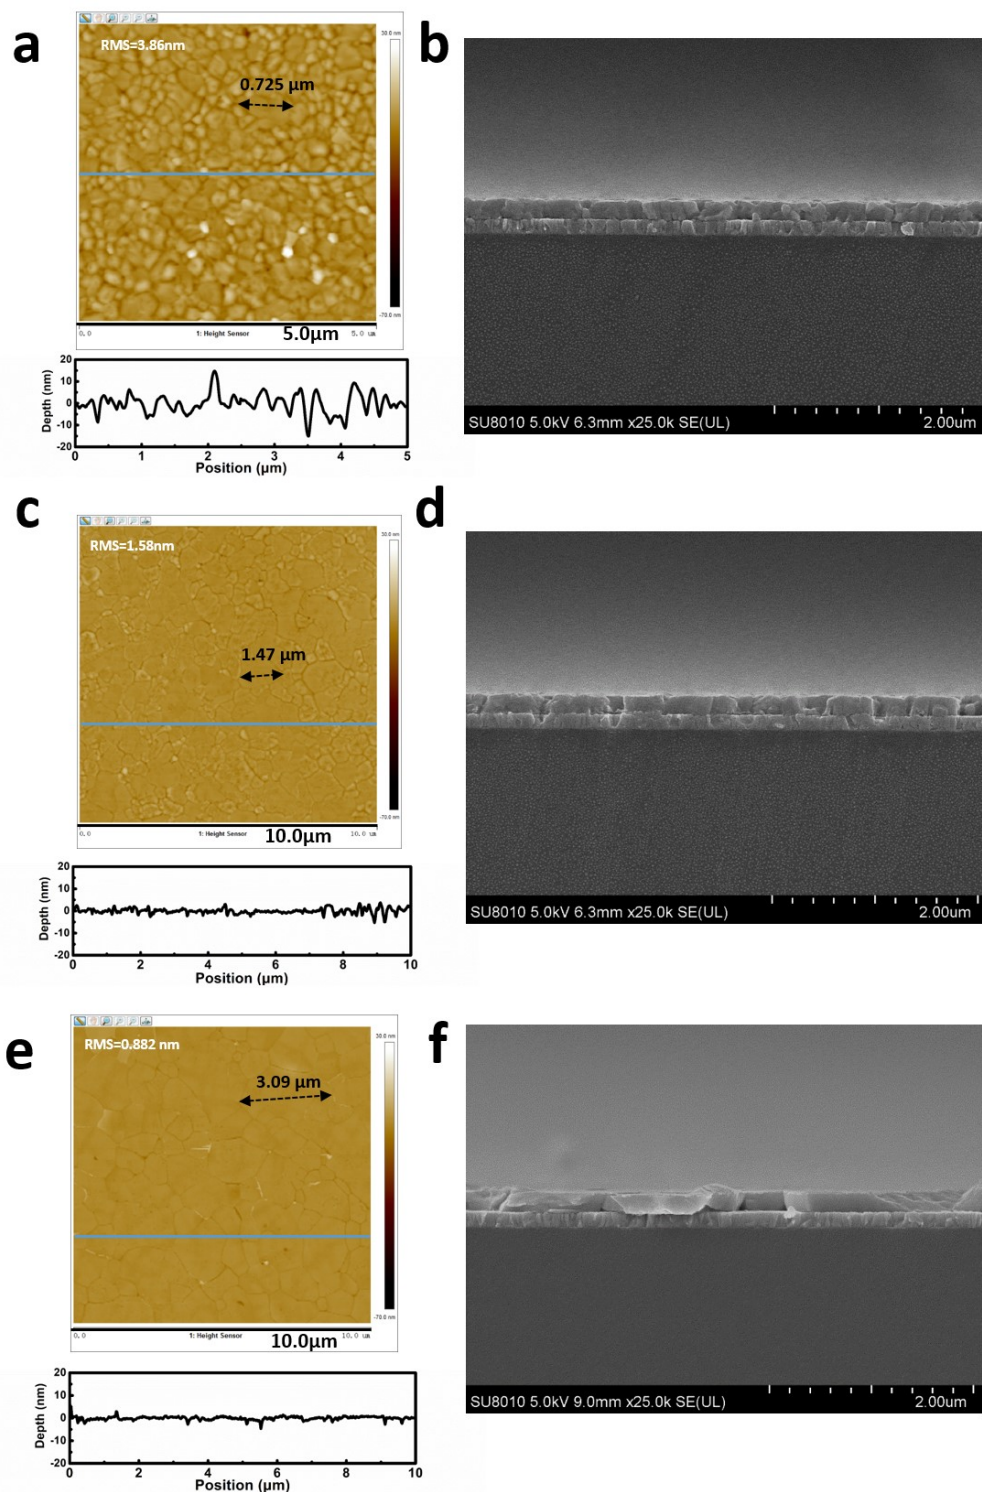

**Fig. S9** (a) Top-view AFM image, (b) cross-sectional SEM images of the MAPbI<sub>3</sub> film with TPR treatment (100 °C, 150 Mpa for 1 h); (c) Top-view AFM image, (d) cross-sectional SEM images of the MAPbI<sub>3</sub> film with TPR treatment (100 °C, 150 Mpa for 3 h); (e) Top-view AFM image, (f) cross-sectional SEM images of the MAPbI<sub>3</sub> film with TPR treatment (100 °C, 150 Mpa for 5 h)

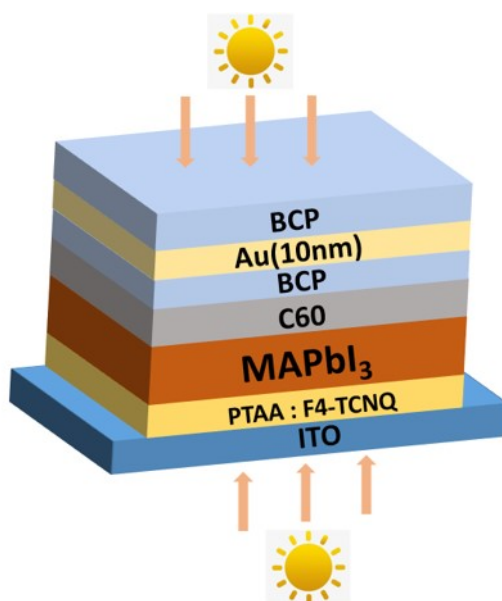

Fig. S10 Schematic device structure of SPSCs

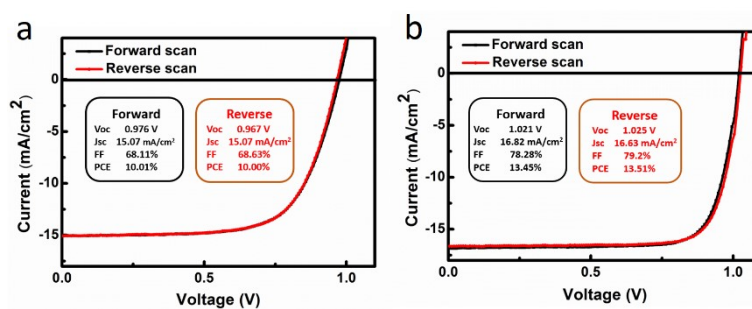

Fig. S11 Forward and reverse J-V scans at a 110 mV s<sup>-1</sup> scan rate of (a) control SPSC, and (b) TPR SPSC.

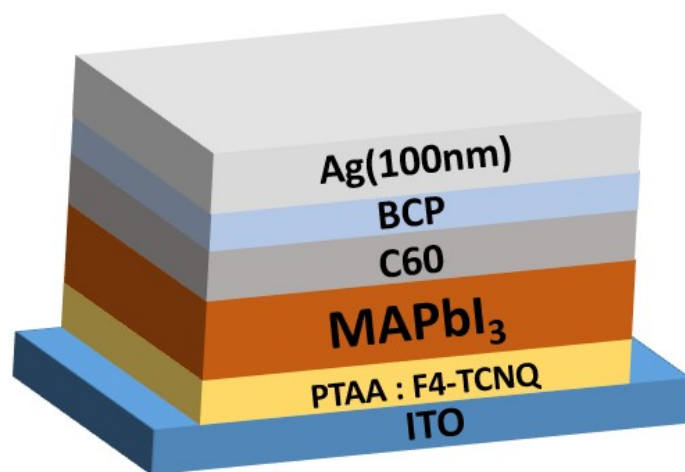

**Fig. S12** Schematic device structure of Opaque PSCs.

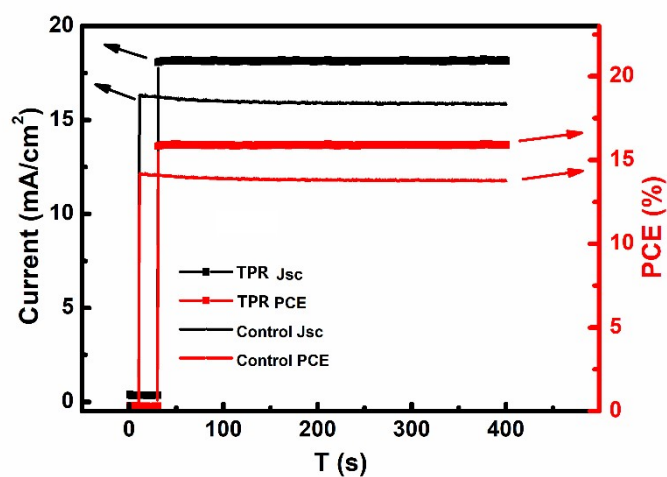

**Fig. S13** 400s steady-state photocurrent and power output at maximum power point of control PSCs and TPR PSCs.



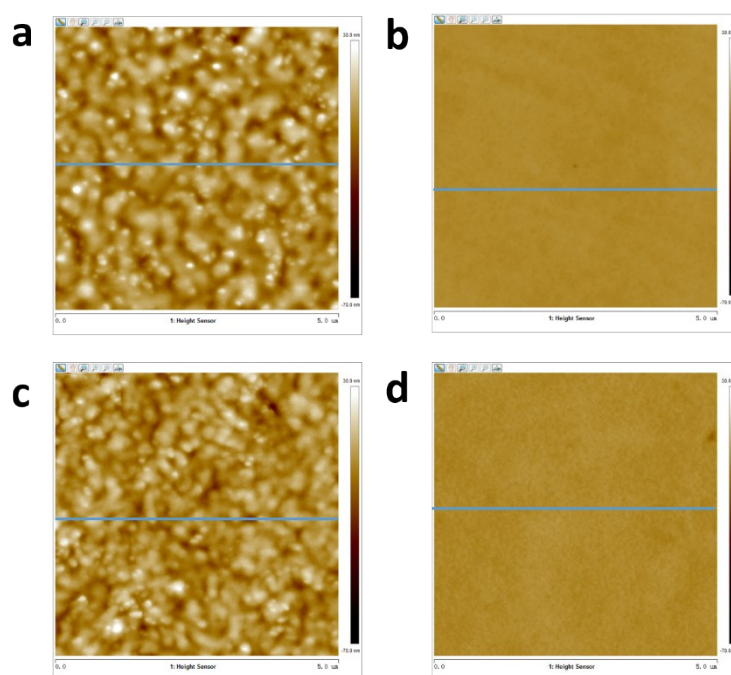

**Fig. S14** AFM topographic images of composite films (ITO/PTAA/MAPbI<sub>3</sub>/C<sub>60</sub>/BCP) based on (a) precursor film and (b) TPR film; and Au electrodes (ITO/PTAA/MAPbI<sub>3</sub>/C<sub>60</sub>/BCP/Au) of (c) control SPSC and (d) TPR SPSC.

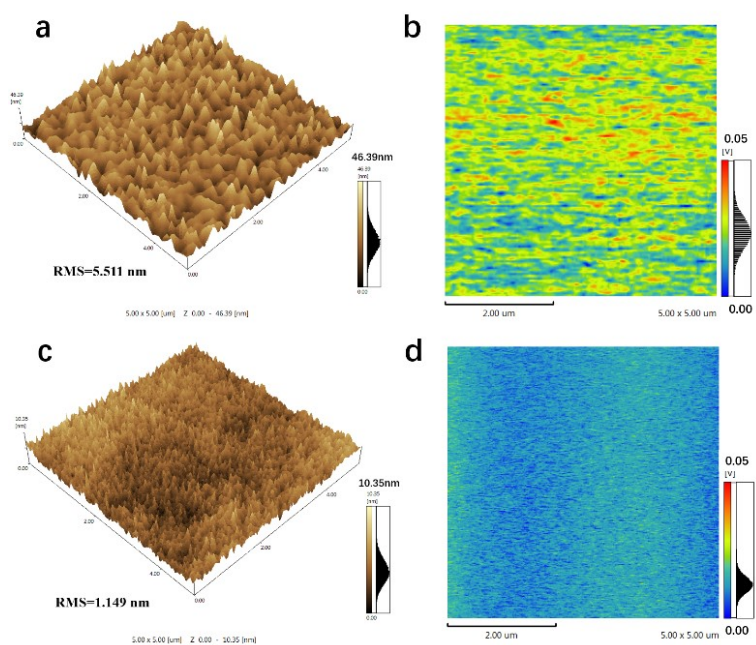

**Fig. S15** (a) Three-dimensional topographic AFM image and (b) KFM image of Au electrode (ITO/PTAA/MAPbI<sub>3</sub>/C<sub>60</sub>/BCP/Au) based on control film; (c) Three-dimensional topographic AFM image and (d) KFM image of Au electrode (ITO/PTAA/MAPbI<sub>3</sub>/C<sub>60</sub>/BCP/Au) based on TPR film.

Table S1. Transmittance of control films and TPR films (PTAA/MAPbI<sub>3</sub>) averaged over 5 films.

| <b>Sample number</b> | <b>1</b>       | <b>2</b>       | <b>3</b>       | <b>4</b>       | <b>5</b>       | <b>Average</b> |
|----------------------|----------------|----------------|----------------|----------------|----------------|----------------|
| <b>Control</b>       | <b>25.85 %</b> | <b>26.71 %</b> | <b>26.53 %</b> | <b>25.74 %</b> | <b>25.41 %</b> | <b>26.05 %</b> |
| <b>TPR</b>           | <b>26.83 %</b> | <b>28.17 %</b> | <b>28.75 %</b> | <b>26.11 %</b> | <b>27.82 %</b> | <b>27.54 %</b> |

Table S2. Sheet resistance of Au films based on the control films and TPR films

| <b>Sheet resistance (<math>\Omega/\text{Sq}</math> uare)</b> | <b>1</b>    | <b>2</b>    | <b>3</b>    | <b>4</b>    | <b>Average</b> |
|--------------------------------------------------------------|-------------|-------------|-------------|-------------|----------------|
| <b>Control</b>                                               | <b>16.3</b> | <b>16.4</b> | <b>18.2</b> | <b>17.5</b> | <b>17.1</b>    |
| <b>TPR</b>                                                   | <b>27.4</b> | <b>25</b>   | <b>26.5</b> | <b>26.8</b> | <b>26.4</b>    |
